# Supplementary material for: Curculigoside Attenuates Endoplasmic Reticulum Stress-Induced Epithelial Cell and Fibroblast Senescence by Regulating the SIRT1-P300 Signaling Pathway
Source: MDPI journal article supplement (doi:10.3390/antiox13040420), 2024-03-29
Supplement: s1 [file s1]

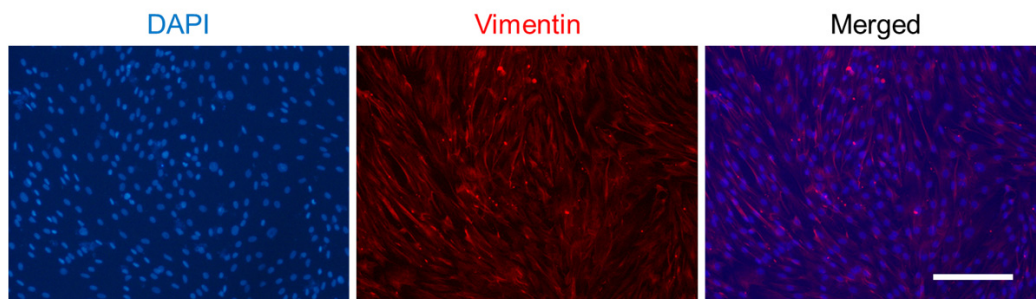

**Supplementary Figure S1.** Identification of primary fibroblasts. Immunofluorescence staining reflecting the expression levels of Vimentin in the primary mouse fibroblasts. Red represents Ph-Vimentin, and blue represents DAPI. Scale bars represent 100  $\mu\text{m}$ .

Acq. Operator : SYSTEM  
 Acq. Instrument : 12601c  
 Seq. Line : 7  
 Location : Vial 34  
 Inj : 1  
 Inj Volume : 2.000 µl

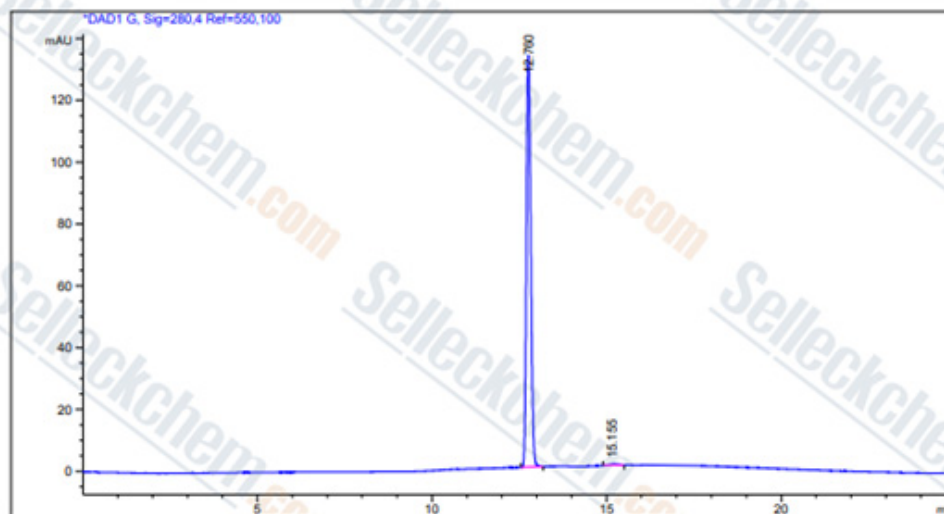

#### Area Percent Report

Sorted By : Signal  
 Multiplier : 1.0000  
 Dilution : 1.0000  
 Use Multiplier & Dilution Factor with ISTDs

Signal 1: DAD1 G, Sig=280,4 Ref=550,100  
 Signal has been modified after loading from rawdata file!

| Peak # | RetTime [min] | Type | Width [min] | Area [mAU*s] | Height [mAU] | Area %  |
|--------|---------------|------|-------------|--------------|--------------|---------|
| 1      | 12.760        | BB   | 0.1326      | 1138.42017   | 133.34436    | 99.8459 |
| 2      | 15.155        | BB   | 0.2102      | 1.75701      | 0.36703      | 0.1541  |

Totals : 1140.17718 134.51139

\*\*\* End of Report \*\*\*

Supplementary Figure S2. The HPLC spectrum of CCG.

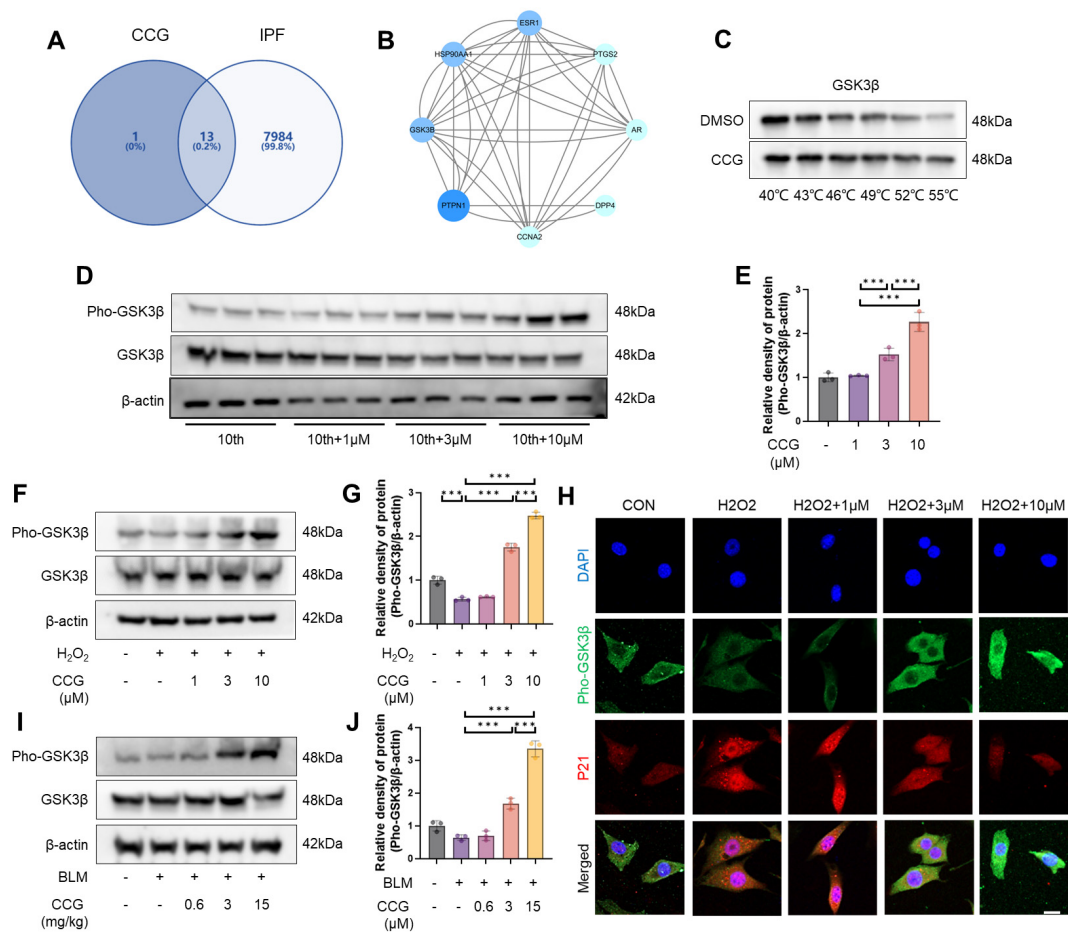

**Supplementary Figure S3.** CCG promoted the phosphorylation of GSK3β. (A,B) Network pharmacology screening of CCG target proteins. (C) CESTA reflected the binding of CCG to GSK3β. (D,E) WB analysis of the protein levels of Pho-GSK3β and GSK3β in fibroblasts. (F,G) WB analysis of the protein levels of Pho-GSK3β and GSK3β in AECs. (H) Immunofluorescence staining showing the levels of Pho-GSK3β and P21 in AECs. Red represents P21, green represents Pho-GSK3β, and blue represents DAPI. Scale bars represented 50 μm. (I,J) WB analysis of the protein levels of Pho-GSK3β and GSK3β in vivo. Data represent means ± standard deviation, with each experiment independently repeated at least three times. (\*\*\*)  $p < 0.001$ .

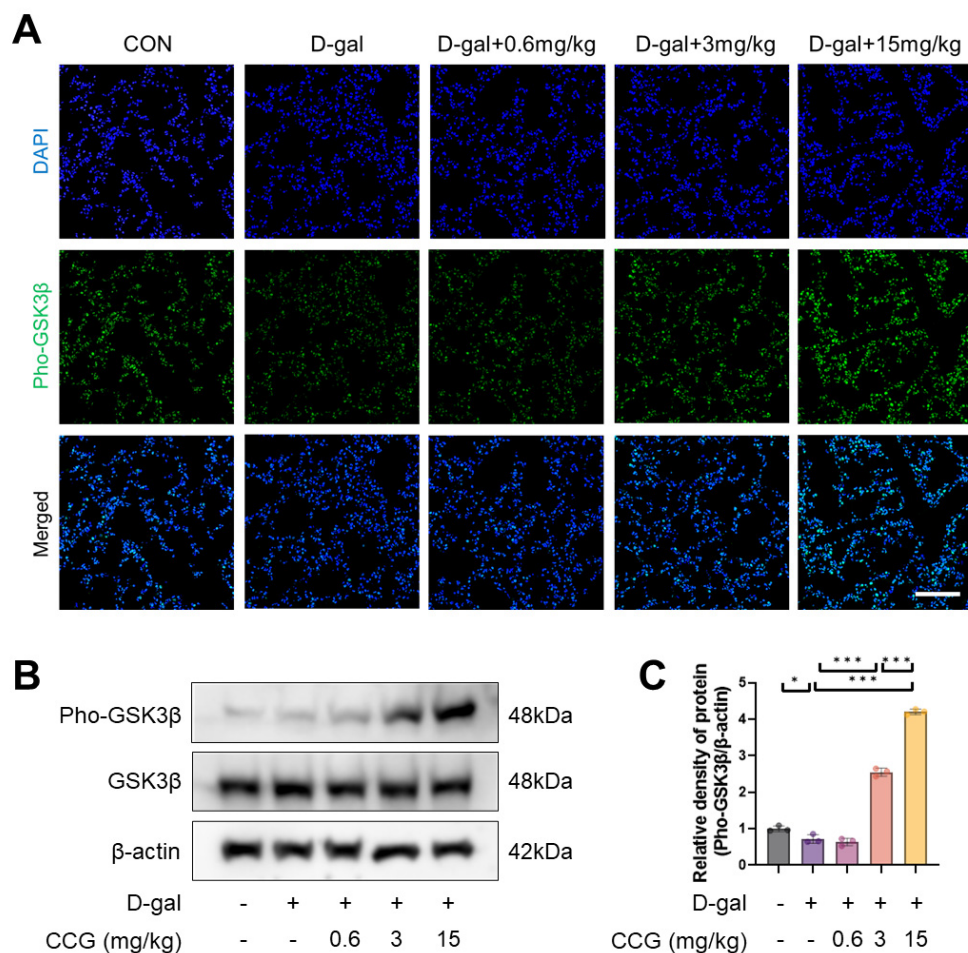

**Supplementary Figure S4.** CCG promoted the phosphorylation of GSK3 $\beta$  in the lungs of D-gal-induced mice. (A) Immunofluorescence staining reflecting the expression levels of Pho-GSK3 $\beta$  in the lungs. Green represents Pho-GSK3 $\beta$ , and blue represents DAPI. Scale bars represent 100  $\mu$ m. (B,C) WB analysis of the protein levels of Pho-GSK3 $\beta$  and GSK3 $\beta$  in vivo. Data represent means  $\pm$  standard deviation, with each experiment independently repeated at least three times. (\*  $p < 0.05$ , and \*\*\*  $p < 0.001$ ).
